# Supplementary material
Source: Springer Nature journal article supplement (https://springermedizin.de/resource/supplementary/12931_2012_1253_MOESM5_ESM.pdf/9425832)

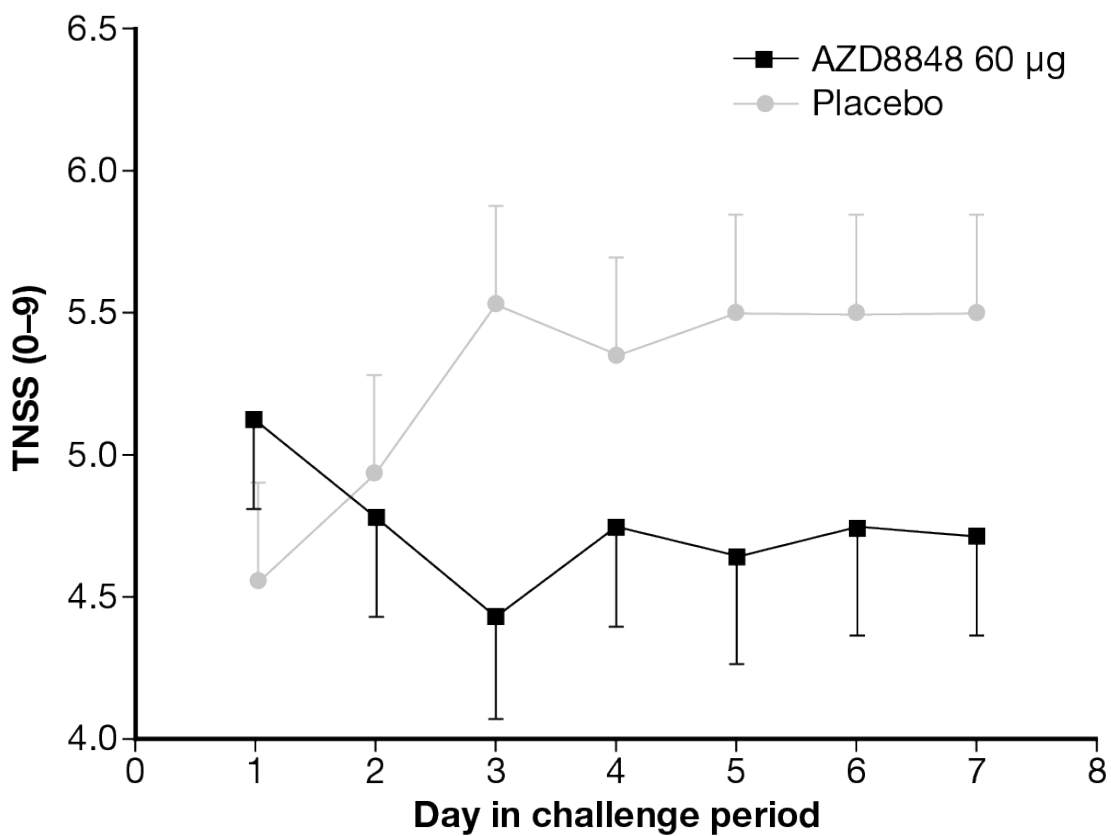

Supplement: MOESM5 [file 9425832]
